# Supplementary material for: Species Diversity, Habitat Distribution, and Blood Meal Analysis of Haematophagous Dipterans Collected by CDC-UV Light Traps in the Dominican Republic
Source: MDPI journal article supplement (doi:10.3390/pathogens11070714), 2022-06-21
Supplement: s1 [file s1]

**Table S1**

Estimates of evolutionary divergence of *cox1* over sequence pairs between groups. Analyses were conducted using the Tamura 3-parameter model (Tamura, 1992). Standard error estimate(s) are shown above the diagonal and were obtained by a bootstrap procedure (1000 replicates). This analysis involved 9 nucleotide sequences with *C. imicola* as outgroup. Codon positions included were 1st+2nd+3rd+Noncoding. All positions containing gaps and missing data were eliminated (complete deletion option). There were a total of 614 positions in the final dataset. Evolutionary analyses were conducted in MEGA11 (Tamura et al., 2021).

|                                         | <i>C. foxi</i><br>(LC704477) D.R. | <i>C. foxi</i><br>(LC704478) D.R. | <i>C. foxi</i><br>(LC704479) D.R. | <i>C. foxi</i><br>(LC704480) D.R. | <i>C. foxi</i><br>(LC704481) D.R. | <i>C. foxi</i> (LC704482) D.R. | <i>C. foxi</i><br>(PLECH1418-20) C.R. | <i>C. foxi</i><br>(PLJAY474-20) C.R. | <i>C. imicola</i><br>(KT307823) (outgroup) |
|-----------------------------------------|-----------------------------------|-----------------------------------|-----------------------------------|-----------------------------------|-----------------------------------|--------------------------------|---------------------------------------|--------------------------------------|--------------------------------------------|
| <i>C. foxi</i> (LC704477) D.R.          |                                   | 0,00233                           | 0,00000                           | 0,00000                           | 0,00163                           | 0,00000                        | 0,00166                               | 0,00228                              | 0,01767                                    |
| <i>C. foxi</i> (LC704478) D.R.          | 0,00327                           |                                   | 0,00233                           | 0,00233                           | 0,00284                           | 0,00233                        | 0,00162                               | 0,00327                              | 0,01787                                    |
| <i>C. foxi</i> (LC704479) D.R.          | 0,00000                           | 0,00327                           |                                   | 0,00000                           | 0,00163                           | 0,00000                        | 0,00166                               | 0,00228                              | 0,01767                                    |
| <i>C. foxi</i> (LC704480) D.R.          | 0,00000                           | 0,00327                           | 0,00000                           |                                   | 0,00163                           | 0,00000                        | 0,00166                               | 0,00228                              | 0,01767                                    |
| <i>C. foxi</i> (LC704481) D.R.          | 0,00163                           | 0,00491                           | 0,00163                           | 0,00163                           |                                   | 0,00163                        | 0,00231                               | 0,00162                              | 0,01786                                    |
| <i>C. foxi</i> (LC704482) D.R.          | 0,00000                           | 0,00327                           | 0,00000                           | 0,00000                           | 0,00163                           |                                | 0,00166                               | 0,00228                              | 0,01767                                    |
| <i>C. foxi</i> (PLECH1418-20) C.R.      | 0,00163                           | 0,00163                           | 0,00163                           | 0,00163                           | 0,00327                           | 0,00163                        |                                       | 0,00283                              | 0,01768                                    |
| <i>C. foxi</i> (PLJAY474-20) C.R.       | 0,00327                           | 0,00656                           | 0,00327                           | 0,00327                           | 0,00163                           | 0,00327                        | 0,00491                               |                                      | 0,01802                                    |
| <i>C. imicola</i> (KT307823) (outgroup) | 0,17669                           | 0,17885                           | 0,17669                           | 0,17669                           | 0,17883                           | 0,17669                        | 0,17670                               | 0,18096                              |                                            |

D.R.= Dominican Republic, R.C.= Costa Rica
